# Supplementary material for: Wound-Microenvironment Engineering through Advanced-Dressing Bioprinting
Source: MDPI journal article supplement (doi:10.3390/ijms23052836), 2022-03-04
Supplement: s1 [file s1]

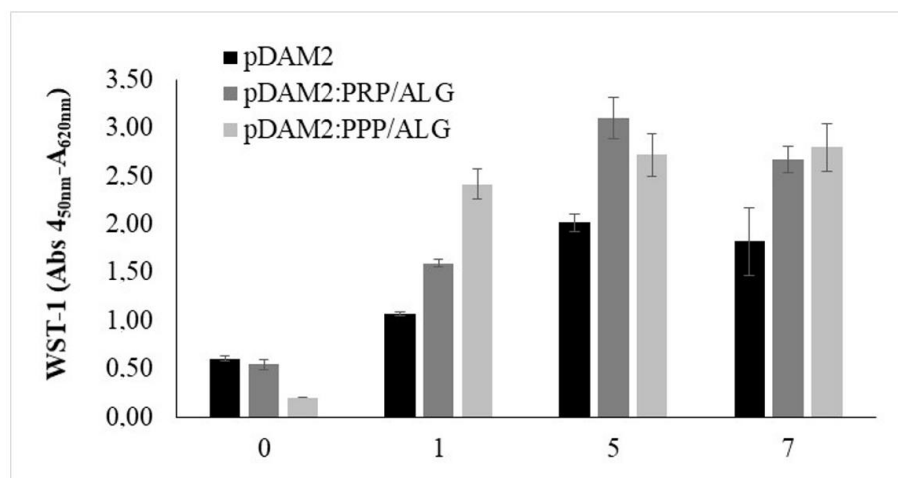

**Figure S1.** HDF metabolic activity encapsulated in pDAM2, pDAM2: PRP/ALG and pDAM2: PPP/ALG hydrogels at 0, 1, 5 and 7 days of culture and analyzed by WST-1 colorimetric assay.

**Table S1.** Primers for RT-PCR.

| Gene (RNA)      | Sequence                                                                                                                                 | ID (Bio-Rad, Laboratories, Spain) |
|-----------------|------------------------------------------------------------------------------------------------------------------------------------------|-----------------------------------|
| GAPDH (1.25 ng) | TCATTTCTGCTATGACAACGAATTTGGCTACAGCAACAGGGTGGTGGAC-<br>CTCATGGCCCACATGGCCTCCAAGGAGTAAGACCCCTGGACCACCAGCCCCAGCA<br>AGAGCACAAGAGGAAGAG      | dHsaCPE5031597                    |
| COL1A1 (2.5 ng) | TTGGTCTCGTCACAGATCACGTCATCGCAACACCTTGCCGTTGTCGCAGAC-<br>GCAGATCCGGCAGGGCTCGGGTTTCCACACGTCCTCGGTCATGGTACCTGAGGCCGTT<br>CTGTACGCAGGT       | dHsaCPE5034390                    |
| COL1A2 (2.5 ng) | AGAGATGAACTGAGGTCCTTGTTTTGTTTGTTCATAATACAAAGGTGCTAATTAA-<br>TAGTATTTTCAGATACTTGAAGAATGTTGATGGTGCTAGAAGAATTTGAGAAGAAATA<br>CTCCTGTATT     | dHsaCPE5026780                    |
| COL3A1 (2.5 ng) | GATGAGATTATGACTTCACTCAAGTCTGTTAATGGACAAATAGAAAGCCTCATTAG-<br>TCCTGATGGTTCTCGTAAAAACCCCGCTAGAAACTGCAGAGACCTGAAATTCTGCCA<br>TCCTGAACT      | dHsaCPE5040292                    |
| COL4A1 (25 ng)  | TTGTGACATTAGCTGAGTCAGGCTTCATTATGTTCTTCTCATAACAGACTTGG-<br>CAGCGGCTGACGTGCGTGCGCAGCTCCCCTGCCTTCAAGGTGGACGGCGTAGGCTT<br>CTTGAACATCTCGC     | dHsaCPE5049054                    |
| COL4A2 (25 ng)  | GTGGGGTTCCTCGCCCAGAGCGTCTTGGCGGGTGTGAAGAAGTTT-<br>GATGTGCCGTGTGGAG-<br>GAAGAGATTGCAGTGGGGGCTGCCAGTGCTACCCTGAGAAAGGTGGACGTGGTCAG<br>CCTGG | dHsaCPE5036732                    |
| COL4A3 (25 ng)  | CCTGGGTAGGGGAAGAGAAGGGGGCATGTGGTATCCTGGAGCATTGTGTATA-<br>GAACTGGAT-<br>TTTCAGACCTGCTGAGGACCGTAAGGCCTGATGGAACACAGAACTGAACTGAGGTT<br>CATGG | dHsaCPE5040370                    |
| ELN (25 ng)     | GGATTCGCTCTAGCATCCCTCCTCTCCTGGGTCCACTTGGCCGTCTCCTCCCCAC-<br>CGATCGCTGTTCCCCACATCTGGGGCGCTTTGGGTTGGAAAACCACCCACACTGG<br>GAATAGCCACC       | dHsaCPE5192509                    |
| FN1 (1.25 ng)   | TGCCTCTCACACTTCCACTCTCCTCGGCCGTTGCTGTGCAGATGCACTGGAG-<br>CAGGTTTCCTCGATTATCCTTCTTGCTCCAGGTGTCTCCAATTCTATAGGATGTCCTTG<br>TGTCTGATCG       | dHsaCPE5035056                    |

**Table S2.** RT-PCR protocol.

| T° (°C) | Time | Ramp Rate | Number of Cycles |
|---------|------|-----------|------------------|
|---------|------|-----------|------------------|

|                     |    |          |          |    |
|---------------------|----|----------|----------|----|
| Hold                | 25 | 3 min    | 2 °C/sec | 1  |
| RT                  | 48 | 60 min   | 2 °C/sec | 1  |
| Enzyme activation   | 95 | 10 min   | 2 °C/sec | 1  |
| Denaturation        | 95 | 30 sec   | 2 °C/sec | 40 |
| Annealing/extension | 55 | 2 min    | 2 °C/sec |    |
| Enzyme deactivation | 98 | 10 min   | 2 °C/sec | 1  |
| Hold                | 4  | Infinite | 2 °C/sec | 1  |
